# Supplementary material
Source: PubMed Central journal article supplement (PMC5805948)
Supplement: rspb20172547supp4.pdf [file rspb20172547supp4.pdf]

## Supplementary Material S4: R code

### Experimental heatwaves negatively impact sperm quality in the zebra finch

Laura L. Hurley, Callum S. McDiarmid, Christopher R. Friesen, Simon C. Griffith, and

Melissah Rowe

### R Markdown

This is an R Markdown output. It includes all the R code to generate the main results in the paper by Hurley et al. on the impact of experimental heatwaves on zebra finch sperm quality.

### Main data file for all data analysis

```
dat <- read.csv("Heatwave/Data_Analysis")
```

## Recovery Comparison Analysis

### Data preparation for looking at recovery

```
#Proportion Motile transformation
dat$propMotile <- (dat$Motile + 1)/(dat$NumberSperm + 1)
dat$logit.propMotile <- log(dat$propMotile/(1-dat$propMotile))

#Proportion Normal Transformation
dat$propNormal <- (dat$CountNormal)/(dat$TotalCount)
dat$logit.propNormal <- log(dat$propNormal/(1-dat$propNormal))

#Subsetting data to only the 23°C samples
dat2 <- dat[dat$SamplingTemp<=24,]
```

### Proportion Normal (transformed) recovery comparisons

```
#Remove NAs
dat2Prop <- dat2 %>% drop_na(PropNormal)

#Comparisons of birds that went from 30°C in period 1 to 40°C in period 2
datA <- dat2Prop[dat2Prop$Part=="P1"&dat2Prop$Timept=="Day01"&dat2Prop$Order=="LH",]
datB <- dat2Prop[dat2Prop$Part=="P1"&dat2Prop$Timept=="Day26"&dat2Prop$
```

```

Order=="LH",]

#Period1 Day01-Day26 (also Period 1-Period2 Day01)
t.test(datA$logit.propNormal, datB$logit.propNormal, paired = TRUE )

datC <- dat2Prop[dat2Prop$Part=="P2"&dat2Prop$Timept=="Day01"&dat2Prop$
Order=="LH",]
datD <- dat2Prop[dat2Prop$Part=="P2"&dat2Prop$Timept=="Day21"&dat2Prop$
Order=="LH",]
datE <- dat2Prop[dat2Prop$Part=="P2"&dat2Prop$Timept=="Day26"&dat2Prop$
Order=="LH",]

#Period2 Day01-Day21
t.test(datC$logit.propNormal, datD$logit.propNormal, paired = TRUE )
#Period2 Day01-Day26
t.test(datC$logit.propNormal, datE$logit.propNormal, paired = TRUE )
#Period2 Day21-Day26
t.test(datD$logit.propNormal, datE$logit.propNormal, paired = TRUE )
#Period1 Day01-Period2 Day26
t.test(datA$logit.propNormal, datE$logit.propNormal, paired = TRUE )

#Comparisons of birds that went from 40°C in period 1 to 30°C in period
2
datF <- dat2Prop[dat2Prop$Part=="P1"&dat2Prop$Timept=="Day01"&dat2Prop$
Order=="HL",]
datG <- dat2Prop[dat2Prop$Part=="P1"&dat2Prop$Timept=="Day26"&dat2Prop$
Order=="HL",]

#Period1 Day01-Day26 (also Period 1-Period2 Day01)
t.test(datF$logit.propNormal, datG$logit.propNormal, paired = TRUE )

datH <- dat2Prop[dat2Prop$Part=="P2"&dat2Prop$Timept=="Day01"&dat2Prop$
Order=="HL",]
datI <- dat2Prop[dat2Prop$Part=="P2"&dat2Prop$Timept=="Day21"&dat2Prop$
Order=="HL",]
datJ <- dat2Prop[dat2Prop$Part=="P2"&dat2Prop$Timept=="Day26"&dat2Prop$
Order=="HL",]

#Period2 Day01-Day21
t.test(datH$logit.propNormal, datI$logit.propNormal, paired = TRUE )
#Period2 Day01-Day26
t.test(datH$logit.propNormal, datJ$logit.propNormal, paired = TRUE )
#Period2 Day21-Day26
t.test(datI$logit.propNormal, datJ$logit.propNormal, paired = TRUE )
#Period1 Day01-Period2 Day26
t.test(datF$logit.propNormal, datJ$logit.propNormal, paired = TRUE )

```

## Sperm swimming speed (VCL) recovery comparisons

```
More10 <- dat2[dat2$Motile>=10,] #for VCL
dat2VCL <- More10 %>% drop_na(VCL)

##Comparisons of birds that went from 30°C in period 1 to 40°C in period 2
datAv <- dat2VCL[dat2VCL$Part=="P1"&dat2VCL$Timept=="Day01"&dat2VCL$Order=="LH",]
datBv <- dat2VCL[dat2VCL$Part=="P1"&dat2VCL$Timept=="Day26"&dat2VCL$Order=="LH",]

#Period1 Day01-Day26 (also Period 1-Period2 Day01)
t.test(datA$VCL, datB$VCL, paired = TRUE )

datCv <- dat2VCL[dat2VCL$Part=="P2"&dat2VCL$Timept=="Day01"&dat2VCL$Order=="LH",]
datDv <- dat2VCL[dat2VCL$Part=="P2"&dat2VCL$Timept=="Day21"&dat2VCL$Order=="LH",]
datEv <- dat2VCL[dat2VCL$Part=="P2"&dat2VCL$Timept=="Day26"&dat2VCL$Order=="LH",]

#Period2 Day01-Day21
t.test(datCv$VCL, datDv$VCL, paired = TRUE )
#Period2 Day01-Day26
t.test(datCv$VCL, datEv$VCL, paired = TRUE )
#Period2 Day21-Day26
t.test(datDv$VCL, datEv$VCL, paired = TRUE )
#Period1 Day01-Period2 Day26
t.test(datA$VCL, datE$VCL, paired = TRUE )

##Comparisons of birds that went from 40°C in period 1 to 30°C in period 2
datFv <- dat2VCL[dat2VCL$Part=="P1"&dat2VCL$Timept=="Day01"&dat2VCL$Order=="HL",]
datGv <- dat2VCL[dat2VCL$Part=="P1"&dat2VCL$Timept=="Day26"&dat2VCL$Order=="HL",]

#Period1 Day01-Day26 (also Period 1-Period2 Day01)
t.test(datFv$VCL, datGv$VCL, paired = TRUE )

datHv <- dat2VCL[dat2VCL$Part=="P2"&dat2VCL$Timept=="Day01"&dat2VCL$Order=="HL",]
datIv <- dat2VCL[dat2VCL$Part=="P2"&dat2VCL$Timept=="Day21"&dat2VCL$Order=="HL",]
datJv <- dat2VCL[dat2VCL$Part=="P2"&dat2VCL$Timept=="Day26"&dat2VCL$Order=="HL",]

#Period2 Day01-Day21
t.test(datHv$VCL, datIv$VCL, paired = TRUE )
```

```

#Period2 Day01-Day26
t.test(datHv$VCL, datJv$VCL, paired = TRUE )
#Period2 Day21-Day26
t.test(datIv$VCL, datJv$VCL, paired = TRUE )
#Period1 Day01-Period2 Day26
t.test(datFv$VCL, datJv$VCL, paired = TRUE )

```

## Proportion Motile (transformed) recovery comparisons

```

#Remove NAs
dat2Motile <- dat2 %>% drop_na(PropMotile)

##Comparisons of birds that went from 30°C in period 1 to 40°C in period 2
datAm <- dat2Motile[dat2Motile$Part=="P1"&dat2Motile$Timept=="Day01"&dat2Motile$Order=="LH",]
datBm <- dat2Motile[dat2Motile$Part=="P1"&dat2Motile$Timept=="Day26"&dat2Motile$Order=="LH",]

#Period1 Day01-Day26 (also Period 1-Period2 Day01)
t.test(datAm$logit.propMotile, datBm$logit.propMotile, paired = TRUE )

datCm <- dat2Motile[dat2Motile$Part=="P2"&dat2Motile$Timept=="Day01"&dat2Motile$Order=="LH",]
datDm <- dat2Motile[dat2Motile$Part=="P2"&dat2Motile$Timept=="Day21"&dat2Motile$Order=="LH",]
datEm <- dat2Motile[dat2Motile$Part=="P2"&dat2Motile$Timept=="Day26"&dat2Motile$Order=="LH",]

#Period2 Day01-Day21
t.test(datCm$logit.propMotile, datDm$logit.propMotile, paired = TRUE )
#Period2 Day01-Day26
t.test(datCm$logit.propMotile, datEm$logit.propMotile, paired = TRUE )
#Period2 Day21-Day26
t.test(datDm$logit.propMotile, datEm$logit.propMotile, paired = TRUE )
#Period1 Day01-Period2 Day26
t.test(datAm$logit.propMotile, datEm$logit.propMotile, paired = TRUE )

##Comparisons of birds that went from 40°C in period 1 to 30°C in period 2
datFm <- dat2Motile[dat2Motile$Part=="P1"&dat2Motile$Timept=="Day01"&dat2Motile$Order=="HL",]
datGm <- dat2Motile[dat2Motile$Part=="P1"&dat2Motile$Timept=="Day26"&dat2Motile$Order=="HL",]

#Period1 Day01-Day26 (also Period 1-Period2 Day01)
t.test(datFm$logit.propMotile, datGm$logit.propMotile, paired = TRUE )

datHm <- dat2Motile[dat2Motile$Part=="P2"&dat2Motile$Timept=="Day01"&dat2Motile$Order=="HL",]

```

```

t2Motile$Order=="HL",]
datIm <- dat2Motile[dat2Motile$Part=="P2"&dat2Motile$Timept=="Day21"&da
t2Motile$Order=="HL",]
datJm <- dat2Motile[dat2Motile$Part=="P2"&dat2Motile$Timept=="Day26"&da
t2Motile$Order=="HL",]

#Period2 Day01-Day21
t.test(datHm$logit.propMotile, datIm$logit.propMotile, paired = TRUE )
#Period2 Day01-Day26
t.test(datHm$logit.propMotile, datJm$logit.propMotile, paired = TRUE )
#Period2 Day21-Day26
t.test(datIm$logit.propMotile, datJm$logit.propMotile, paired = TRUE )
#Period1 Day01-Period2 Day26
t.test(datFm$logit.propMotile, datJm$logit.propMotile, paired = TRUE )

```

## Cloacal temperature recovery comparisons

```

##Comparisons of birds that went from 30°C in period 1 to 40°C in perio
d 2

```

```

datAc <- dat2[dat2$Part=="P1"&dat2$Timept=="Day01"&dat2$Order=="LH",]
datBc <- dat2[dat2$Part=="P1"&dat2$Timept=="Day26"&dat2$Order=="LH",]

```

```

#Period1 Day01-Day26 (also Period 1-Period2 Day01)

```

```

t.test(datAc$CloacalTemp, datBc$CloacalTemp, paired = TRUE )

```

```

datCc <- dat2[dat2$Part=="P2"&dat2$Timept=="Day01"&dat2$Order=="LH",]
datDc <- dat2[dat2$Part=="P2"&dat2$Timept=="Day21"&dat2$Order=="LH",]
datEc <- dat2[dat2$Part=="P2"&dat2$Timept=="Day26"&dat2$Order=="LH",]

```

```

#Period2 Day01-Day21

```

```

t.test(datCc$CloacalTemp, datDc$CloacalTemp, paired = TRUE )

```

```

#Period2 Day01-Day26

```

```

t.test(datCc$CloacalTemp, datEc$CloacalTemp, paired = TRUE )

```

```

#Period2 Day21-Day26

```

```

t.test(datDc$CloacalTemp, datEc$CloacalTemp, paired = TRUE )

```

```

#Period1 Day01-Period2 Day26

```

```

t.test(datAc$CloacalTemp, datEc$CloacalTemp, paired = TRUE )

```

```

##Comparisons of birds that went from 40°C in period 1 to 30°C in perio
d 2

```

```

datFc <- dat2[dat2$Part=="P1"&dat2$Timept=="Day01"&dat2$Order=="HL",]
datGc <- dat2[dat2$Part=="P1"&dat2$Timept=="Day26"&dat2$Order=="HL",]

```

```

#Period1 Day01-Day26 (also Period 1-Period2 Day01)

```

```

t.test(datFc$CloacalTemp, datGc$CloacalTemp, paired = TRUE )

```

```

datHc <- dat2[dat2$Part=="P2"&dat2$Timept=="Day01"&dat2$Order=="HL",]

```

```

datIc <- dat2[dat2$Part=="P2"&dat2$Timept=="Day21"&dat2$Order=="HL",]

```

```

datJc <- dat2[dat2$Part=="P2"&dat2$Timept=="Day26"&dat2$Order=="HL",]

```

```

#Period2 Day01-Day21
t.test(datHc$CloacalTemp, datIc$CloacalTemp, paired = TRUE )
#Period2 Day01-Day26
t.test(datHc$CloacalTemp, datJc$CloacalTemp, paired = TRUE )
#Period2 Day21-Day26
t.test(datIc$CloacalTemp, datJc$CloacalTemp, paired = TRUE )
#Period1 Day01-Period2 Day26
t.test(datFc$CloacalTemp, datJc$CloacalTemp, paired = TRUE )

```

## Comparisons between groups at start of experiment

```

#Proportion Normal
t.test(datA$logit.propNormal, datF$logit.propNormal, paired = TRUE )
#Sperm swimming speed (VCL)
t.test(datAv$VCL, datFv$VCL, paired = TRUE )
#Proportion Motile
t.test(datAm$logit.propMotile, datFm$logit.propMotile, paired = TRUE )
#Cloacal Temperature
t.test(datAc$CloacalTemp, datFc$CloacalTemp, paired = TRUE )
#Body Conditon (BCI)
t.test(datAc$BCI, datFc$BCI, paired = TRUE )

```

## Change Data Analysis

### Data preparation looking at the change in trait value (i.e. value at dayX – value at day 1, where X is day 3, 7, 11, or 14)

```

library(lme4)
library(lsmmeans)
library(tidy)
library(MuMIn)
#remove all the 23°C samples from dataframe
dat3 <- dat[dat$SamplingTemp>=24,]
#Drop lines with < 10 sperm swimming: for use with CngVCL only
dat4 <- dat3[dat3$Motile>=10,]
#remove NAs just form CngVCL column
dat5 <- dat4 %>% drop_na(CngVCL)
#removes NAs just from CngPropNormal
dat6 <- dat3 %>% drop_na(CngPropNormal)
#gets rid of row with INF issue in last case that causes issue w Logit transformation
dat7 <- dat[-nrow(dat),]
#removes NAs just from CngPropMotile
dat8 <- dat3 %>% drop_na(CngPropMotile)

```

## Change model proportion normal

```
CngPropNormal<-lm(CngPropNormal ~SamplingTempF*Part*TimePtN+BCI, data=dat6)
```

```
CngPropNormal1<-lmer(CngPropNormal ~SamplingTempF*Part*TimePtN+BCI+(1|BandNumber), data=dat6, REML=FALSE) #Use this one
```

```
CngPropNormal2<-lmer(CngPropNormal ~SamplingTempF*Part*TimePtN+BCI+(1|BandNumber)+(1|Cage)+(1|Mom), data=dat6, REML=FALSE)
```

```
anova(CngPropNormal1,CngPropNormal) #bandnumber - no random
```

```
anova(CngPropNormal2,CngPropNormal1) #all random - band number
```

```
summary(CngPropNormal1) #drop three way
```

```
AIC(CngPropNormal1)
```

```
CngPropNormal1drop1<-lmer(CngPropNormal~SamplingTempF*TimePtN+SamplingTempF*Part+Part*TimePtN+BCI+(1|BandNumber), data=dat6, REML=FALSE)
```

```
anova(CngPropNormal1drop1, CngPropNormal1)
```

```
summary(CngPropNormal1drop1) #all significant but BCI.
```

```
AIC(CngPropNormal1drop1)
```

```
CngPropNormalTRUE<-lmer(CngPropNormal~SamplingTempF*TimePtN+SamplingTempF*Part+Part*TimePtN+BCI+(1|BandNumber), data=dat6, REML=TRUE)
```

```
summary(CngPropNormalTRUE) #30-P1
```

```
AIC(CngPropNormalTRUE)
```

```
r.squaredGLMM(CngPropNormalTRUE)
```

```
samplingPN <- relevel(dat6$SamplingTempF, ref="40C")
```

```
CngPropNormalTRUEr1<-lmer(CngPropNormal~samplingPN*TimePtN+samplingPN*Part+Part*TimePtN+BCI+(1|BandNumber), data=dat6, REML=TRUE)
```

```
summary(CngPropNormalTRUEr1) #40-P1
```

```
PartPN <- relevel(dat6$Part, ref="P2")
```

```
CngPropNormalTRUEr2<-lmer(CngPropNormal~SamplingTempF*TimePtN+SamplingTempF*PartPN+PartPN*TimePtN+BCI+(1|BandNumber), data=dat6, REML=TRUE)
```

```
summary(CngPropNormalTRUEr2) #30-P2
```

```
CngPropNormalTRUEr3<-lmer(CngPropNormal~samplingPN*TimePtN+samplingPN*PartPN+PartPN*TimePtN+BCI+(1|BandNumber), data=dat6, REML=TRUE)
```

```
summary(CngPropNormalTRUEr3) #40-P2
```

```
anova(CngPropNormalTRUE)
```

## Change model sperm swimming speed (VCL)

```
CngVCL<-lm(CngVCL~SamplingTempF*Part*TimePtN+BCI, data=dat5)
```

```
CngVCL1<-lmer(CngVCL~SamplingTempF*Part*TimePtN+BCI+(1|BandNumber), data=dat5, REML=FALSE) #Use this one
```

```
CngVCL2<-lmer(CngVCL~SamplingTempF*Part*TimePtN+BCI+(1|BandNumber)+(1|Cage)+(1|Mom), data=dat5, REML=FALSE)
```

```

anova(CngVCL1,CngVCL) #bandnumber - no random
anova(CngVCL2,CngVCL1) #all random - band number
summary(CngVCL1) #no sig interactions
AIC(CngVCL1)

CngVCL1drop1<-lmer(CngVCL~SamplingTempF*Part+SamplingTempF*TimePtN+Part
*TimePtN+BCI+(1|BandNumber), data=dat5, REML=FALSE) #dropping threeway
anova(CngVCL1drop1,CngVCL1)
summary(CngVCL1drop1) #drop Temp:Part
AIC(CngVCL1drop1)

CngVCL1drop2<-lmer(CngVCL~SamplingTempF*Part+Part*TimePtN+BCI+(1|BandNu
mber), data=dat5, REML=FALSE) #dropping threeway
anova(CngVCL1drop2, CngVCL1drop1)
summary(CngVCL1drop2) #drop Part:Time
AIC(CngVCL1drop2)

CngVCL1drop3<-lmer(CngVCL~SamplingTempF*Part+TimePtN+BCI+(1|BandNumber)
, data=dat5, REML=FALSE) #dropping threeway
anova(CngVCL1drop3,CngVCL1drop2)
summary(CngVCL1drop3) #drop Temp:Part
AIC(CngVCL1drop3)

CngVCL1drop4<-lmer(CngVCL~SamplingTempF+Part+TimePtN+BCI+(1|BandNumber)
, data=dat5, REML=FALSE)
anova(CngVCL1drop4, CngVCL1drop3)
summary(CngVCL1drop4)
AIC(CngVCL1drop4)

CngVCL1TRUE<-lmer(CngVCL~SamplingTempF+Part+TimePtN+BCI+(1|BandNumber),
data=dat5, REML=TRUE)
summary(CngVCL1TRUE) #30-P1
AIC(CngVCL1TRUE)
r.squaredGLMM(CngVCL1TRUE)

samplingVCL <- relevel(dat5$SamplingTempF, ref="40C")
CngVCL1TRUEr1<-lmer(CngVCL~samplingVCL+Part+TimePtN+BCI+(1|BandNumber),
data=dat5, REML=TRUE)
summary(CngVCL1TRUEr1) #40-P1

PartVCL <- relevel(dat5$Part, ref="P2")
CngVCL1TRUEr2<-lmer(CngVCL~SamplingTempF+PartVCL+TimePtN+BCI+(1|BandNum
ber), data=dat5, REML=TRUE)
summary(CngVCL1TRUEr2) #30-P2

CngVCL1TRUEr3<-lmer(CngVCL~samplingVCL+PartVCL+TimePtN+BCI+(1|BandNumbe
r), data=dat5, REML=TRUE)
summary(CngVCL1TRUEr3) #40-P2

```



```
anova(CngVCL1TRUE)
```

## Change model proportion motile

```
CngPropMotile<-lm(CngPropMotile~SamplingTempF*Part*TimePtN+BCI, data=dat8)
```

```
CngPropMotile1<-lmer(CngPropMotile~SamplingTempF*Part*TimePtN+BCI+(1|BandNumber), data=dat8, REML=F) #Use this one
```

```
CngPropMotile2<-lmer(CngPropMotile~SamplingTempF*Part*TimePtN+BCI+(1|BandNumber)+(1|Cage)+(1|Mom), data=dat8, REML=FALSE)
```

```
anova(CngPropMotile1,CngPropMotile) #bandnumber
```

```
anova(CngPropMotile2,CngPropMotile1) #all random - band number
```

```
summary(CngPropMotile1) #all non significant - drop three way
```

```
AIC(CngPropMotile1)
```

```
CngPropMotile1drop1<-lmer(CngPropMotile~SamplingTempF*Part+SamplingTempF*TimePtN+Part*TimePtN+BCI+(1|BandNumber), data=dat8, REML=FALSE)
```

```
anova(CngPropMotile1drop1, CngPropMotile1)
```

```
summary(CngPropMotile1drop1) #all non significant dropt part:time
```

```
AIC(CngPropMotile1drop1)
```

```
CngPropMotile1drop2<-lmer(CngPropMotile~SamplingTempF*Part+SamplingTempF*TimePtN+BCI+(1|BandNumber), data=dat8, REML=FALSE)
```

```
anova(CngPropMotile1drop2, CngPropMotile1drop1)
```

```
summary(CngPropMotile1drop2) #all non significant drop temp:part
```

```
AIC(CngPropMotile1drop2)
```

```
CngPropMotile1drop3<-lmer(CngPropMotile~SamplingTempF*TimePtN+Part+BCI+(1|BandNumber), data=dat8, REML=FALSE)
```

```
anova(CngPropMotile1drop3,CngPropMotile1drop2)
```

```
summary(CngPropMotile1drop3) #all non significant drop temp:time
```

```
AIC(CngPropMotile1drop3)
```

```
CngPropMotile1drop4<-lmer(CngPropMotile~SamplingTempF+TimePtN+Part+BCI+(1|BandNumber), data=dat8, REML=FALSE)
```

```
anova(CngPropMotile1drop4, CngPropMotile1drop3)
```

```
summary(CngPropMotile1drop4)
```

```
AIC(CngPropMotile1drop4)
```

```
CngPropMotile1TRUE<-lmer(CngPropMotile~SamplingTempF+TimePtN+Part+BCI+(1|BandNumber), data=dat8, REML=TRUE)
```

```
summary(CngPropMotile1TRUE) #30-P1
```

```
AIC(CngPropMotile1TRUE)
```

```
r.squaredGLMM(CngPropMotile1TRUE)
```

```
samplingPM <- relevel(dat8$SamplingTempF, ref="40C")
```

```
CngPropMotile1TRUEr1<-lmer(CngPropMotile~samplingPM+TimePtN+Part+BCI+(1|BandNumber), data=dat8, REML=TRUE)
```

```
summary(CngPropMotile1TRUER1) #40-P1
```

```
PartPM <- relevel(dat8$Part, ref="P2")  
CngPropMotile1TRUER2 <- lmer(CngPropMotile~SamplingTempF+TimePtN+PartPM+BCI+(1|BandNumber), data=dat8, REML=TRUE)  
summary(CngPropMotile1TRUER2) #30-P2
```

```
CngPropMotile1TRUER1 <- lmer(CngPropMotile~samplingPM+TimePtN+PartPM+BCI+(1|BandNumber), data=dat8, REML=TRUE)  
summary(CngPropMotile1TRUER1) #40-P2
```

```
anova(CngPropMotile1TRUE)
```

## Change model cloacal temperature

```
CngCloacalTemp <- lm(CngCloacalTemp~SamplingTempF*Part*TimePtN+BCI, data=dat3)
```

```
CngCloacalTemp1 <- lmer(CngCloacalTemp~SamplingTempF*Part*TimePtN+BCI+(1|BandNumber), data=dat3, REML=FALSE) #Use this one
```

```
CngCloacalTemp2 <- lmer(CngCloacalTemp~SamplingTempF*Part*TimePtN+BCI+(1|BandNumber)+(1|Cage)+(1|Mom), data=dat3, REML=FALSE)
```

```
anova(CngCloacalTemp1, CngCloacalTemp) #bandnumber - no random
```

```
anova(CngCloacalTemp2, CngCloacalTemp1) #all random - band number
```

```
summary(CngCloacalTemp1) #Temp:Part and Part:time sig, drop 3 way first
```

```
AIC(CngCloacalTemp1)
```

```
CngCloacalTemp1drop1 <- lmer(CngCloacalTemp~SamplingTempF*Part+SamplingTempF*TimePtN+Part*TimePtN+BCI+(1|BandNumber), data=dat3, REML=FALSE)
```

```
anova(CngCloacalTemp1drop1, CngCloacalTemp1)
```

```
summary(CngCloacalTemp1drop1) #drop Temp:time
```

```
AIC(CngCloacalTemp1drop1)
```

```
CngCloacalTemp1drop2 <- lmer(CngCloacalTemp~SamplingTempF*Part+Part*TimePtN+BCI+(1|BandNumber), data=dat3, REML=FALSE)
```

```
anova(CngCloacalTemp1drop2, CngCloacalTemp1drop1)
```

```
summary(CngCloacalTemp1drop2) #interactions both significant
```

```
AIC(CngCloacalTemp1drop2)
```

```
CngCloacalTempTRUE <- lmer(CngCloacalTemp~SamplingTempF*Part+Part*TimePtN+BCI+(1|BandNumber), data=dat3, REML=TRUE)
```

```
summary(CngCloacalTempTRUE) #30-P1
```

```
AIC(CngCloacalTempTRUE)
```

```
r.squaredGLMM(CngCloacalTempTRUE)
```

```
samplingCT <- relevel(dat3$SamplingTempF, ref="40C")
```

```
CngCloacalTempTRUEr1 <- lmer(CngCloacalTemp~samplingCT*Part+Part*TimePtN+BCI+(1|BandNumber), data=dat3, REML=TRUE)
```

```
summary(CngCloacalTempTRUEr1) #40-P1
```

```

PartCT <- relevel(dat3$Part, ref="P2")
CngCloacalTempTRUER2<-lmer(CngCloacalTemp~SamplingTempF*PartCT+PartCT*TimePtN+BCI+(1|BandNumber), data=dat3, REML=TRUE)
summary(CngCloacalTempTRUER2) #30-P2

CngCloacalTempTRUER3<-lmer(CngCloacalTemp~samplingCT*PartCT+PartCT*TimePtN+BCI+(1|BandNumber), data=dat3, REML=TRUE)
summary(CngCloacalTempTRUER3) #40-P2

anova(CngCloacalTempTRUE)

```

## Figures Code

### Library and code needed for all main and supplemental figures

```

library(ggplot2)

#code for calculating SE
summarySE <- function(data=NULL, measurevar, groupvars=NULL, na.rm=FALSE,
                      conf.interval=.95, .drop=TRUE) {
  library(plyr)

  # New version of length which can handle NA's: if na.rm==T, don't count them
  length2 <- function (x, na.rm=FALSE) {
    if (na.rm) sum(!is.na(x))
    else      length(x)
  }

  # This does the summary. For each group's data frame, return a vector with
  # N, mean, and sd
  datac <- ddply(data, groupvars, .drop=.drop,
                .fun = function(xx, col) {
                  c(N      = length2(xx[[col]], na.rm=na.rm),
                    mean   = mean  (xx[[col]], na.rm=na.rm),
                    sd     = sd    (xx[[col]], na.rm=na.rm)
                  )
                },
                measurevar)

  # Rename the "mean" column
  datac <- rename(datac, c("mean" = measurevar))

  datac$se <- datac$sd / sqrt(datac$N) # Calculate standard error of the mean

```

```

# Confidence interval multiplier for standard error
# Calculate t-statistic for confidence interval:
# e.g., if conf.interval is .95, use .975 (above/below), and use df=N
-1
ciMult <- qt(conf.interval/2 + .5, dataac$N-1)
dataac$ci <- dataac$se * ciMult

return(dataac)
}

```

## Main manuscript figures

**Note: different data set needed**

### Figure 1. Proportion Normal

```

RawHeatwave <- read.csv("Heatwave/Data_Figures_Main")

HeatwaveNormal <- RawHeatwave[-c(105,125,235),]

HNormal <- summarySE(HeatwaveNormal, measurevar="PropNormal", groupvars
=c("Order","TimeCode","RmTempF"),na.rm=TRUE) #Need to run code for summ
arySE for this to work!!
HNormalgg <- ggplot(HNormal, aes(x=TimeCode, y=PropNormal, group=Order)
)
pd <- position_dodge(0.2) # to jitter them .2 to the left and right

HNormalgg +
  theme_bw() + #gets rid of grey background / inverts grey and white.
  annotate("rect", xmin=0, xmax=1, ymin=0.5, ymax=0.92, fill="grey", al
pha=0.2,) + #add shaded bar1
  annotate("rect", xmin=5.2, xmax=7, ymin=0.5, ymax=0.92, fill="grey",
alpha=0.2) + #add shaded bar2
  annotate("rect", xmin=11.2, xmax=13.5, ymin=0.5, ymax=0.92, fill="gre
y", alpha=0.2) + #add shaded bar3
  geom_vline(xintercept=7, colour= "grey45", linetype="longdash") +
  geom_errorbar(data=HNormal[-c(6,19),], aes(ymin=PropNormal-se, ymax=P
ropNormal+se), width=.25,position=pd) + #se bars
  geom_line(aes(linetype=c(rep("dashed",13),rep("solid",13))), position
=pd) + #Lines (group=Order) and jitter
  geom_point(data=HNormal[-c(6,19),], aes(shape=RmTempF),size = 2,posit
ion=pd) + # point size and jitter
  scale_y_continuous("Proportion normal sperm", limits=c(0.5,0.92), exp
and=c(0,0)) + #Label y axis
  scale_x_discrete("Sampling time point ", labels = c("T01"="Day1","T02
"="Day3","T03"="Day7","T04"="Day11","T05"="Day14", "T06"="", "T07"="Day2

```

```
6/Day1", "T08"="Day3", "T09"="Day7", "T10"="Day11", "T11"="Day14", "T12"="D
ay21", "T13"="Day26")) + #relabel x-axis
  theme(axis.text.x = element_text(angle = 45, vjust = 1, hjust=1)) + #
tilt the labels
  scale_colour_manual(values=c("black", "#666666"))+
  theme(legend.position = "none")
```

## Figure 2. Cloacal Temperature

```
HTemp <- summarySE(RawHeatwave, measurevar="CloacalTemp", groupvars=c("
Order", "TimeCode", "RmTempF"), na.rm=TRUE)
HTempgg <- ggplot(HTemp, aes(x=TimeCode, y=CloacalTemp, group=Order))
pd <- position_dodge(0.2)
```

```
HTempgg +
  theme_bw() +
  annotate("rect", xmin=0, xmax=1, ymin=38, ymax=43.25, fill="grey", al
pha=0.2,) +
  annotate("rect", xmin=5.2, xmax=7, ymin=38, ymax=43.25, fill="grey",
alpha=0.2) +
  annotate("rect", xmin=11.2, xmax=13.5, ymin=38, ymax=43.25, fill="gre
y", alpha=0.2) +
  geom_errorbar(data=HTemp[-c(6,19),], aes(ymin=CloacalTemp-se, ymax=Cl
oacalTemp+se), width=.25, position=pd) +
  geom_line(aes(linetype=Order), position=pd) +
  geom_point(data=HTemp[-c(6,19),], aes(shape=RmTempF), size = 2, positi
on=pd) +
  geom_vline(xintercept=7, colour= "grey45", linetype="longdash") +
  scale_y_continuous("Male cloacal temperature (°C)", limits=c(38,43.25
), expand=c(0,0)) +
  scale_x_discrete("Sampling time point ", labels = c("T01"="Day1", "T02
"="Day3", "T03"="Day7", "T04"="Day11", "T05"="Day14", "T06"="", "T07"="Day2
6/Day1", "T08"="Day3", "T09"="Day7", "T10"="Day11", "T11"="Day14", "T12"="D
ay21", "T13"="Day26")) +
  theme(axis.text.x = element_text(angle = 45, vjust = 1, hjust=1)) +
  scale_colour_manual(values=c("black", "#666666"))+
  theme(legend.position = "none")
```

## Supplemental 2 Figures

Need summarySE code from above!

### Data upload and transformations

```
Change <- read.csv("Heatwave/Data_Figures_S2")
```

```
#subset to only 30° and 40°C samples
```

```
Change2 <- Change[Change$SamplingTemp>=24,]
```

```
#Removing <10 motile sperm samples for use with CngVCL
Change3 <- Change2[Change2$Motile>=10,]
```

### Figure S3. Change Proportion Normal

```
Normal2 <- Change2[-c(95,120,130,160),] #remove NAs by hand, so Leave ones to create spaces
```

```
HCngNormal <- summarySE(Normal2, measurevar="CngPropNormal", groupvars=c("Order", "TimeCode", "RmTempF"), na.rm=TRUE)
HCngNormalgg <- ggplot(HCngNormal, aes(x=TimeCode, y=CngPropNormal, group=Order, shape=RmTempF))
pd <- position_dodge(0.2)
```

```
HCngNormalgg +
  theme_bw() +
  geom_errorbar(aes(ymin=CngPropNormal-se, ymax=CngPropNormal+se), width=.25, position=pd) +
  geom_line(aes(linetype=Order), position=pd) +
  geom_point(size = 2, position=pd) +
  geom_vline(xintercept=5, colour= "grey45", linetype="longdash") +
  scale_y_continuous("Change in proportion normal sperm", limits=c(-0.4, 0.1), expand=c(0,0)) +
  scale_x_discrete("Sampling time point ", labels = c("T02"="Day3", "T03"="Day7", "T04"="Day11", "T05"="Day14", "T06"="", "T07"="12 day post/Day1", "T08"="Day3", "T09"="Day7", "T10"="Day11", "T11"="Day14", "T12"="7 days post", "T13"="12 days post")) +
  theme(axis.text.x = element_text(angle = 45, vjust = 1, hjust=1)) +
  scale_colour_manual(values=c("black", "#666666"))+ scale_shape_manual(values=c(16,17))+
  theme(legend.position = "none")
```

### Figure S4. Change VCL

```
VCL2 <- Change3[-c(1,6,11,19,27,28,38,43,45,55,60,65,75,76,93,94,113,115,117,118,121,124),] #remove NAs by hand, so Leave ones to create spaces
```

```
HCngVCL <- summarySE(VCL2, measurevar="CngVCL", groupvars=c("Order", "TimeCode", "RmTempF"), na.rm=TRUE)
HCngVCLgg <- ggplot(HCngVCL, aes(x=TimeCode, y=CngVCL, group=Order, shape=RmTempF))
pd <- position_dodge(0.2)
```

```
HCngVCLgg +
  theme_bw() +
  geom_errorbar(aes(ymin=CngVCL-se, ymax=CngVCL+se), width=.25, position=pd) +
  geom_line(aes(linetype=Order), position=pd) +
```

```

geom_point(position=pd, size =2) +
geom_vline(xintercept=5, colour= "grey45", linetype="longdash") +
scale_y_continuous("Change in sperm swimming speed (VCL)" ~ (mu ~ m ~
s^{-1}), limits=c(-16,10), expand=c(0,0)) +
scale_x_discrete("Sampling time point ", labels = c("T01"="Day1", "T02
"="Day3", "T03"="Day7", "T04"="Day11", "T05"="Day14", "T06"="", "T07"="12 d
ay post/Day1", "T08"="Day3", "T09"="Day7", "T10"="Day11", "T11"="Day14", "T
12"="7 days post", "T13"="12 days post")) +
theme(axis.text.x = element_text(angle = 45, vjust = 1, hjust=1)) + s
cale_shape_manual(values=c(16,17))+
scale_colour_manual(values=c("black", "#666666"))+
theme(legend.position = "none")

```

## Figure S5. Change Proportion Motile

```

MotileI2 <- Change2[-c(1,22,44,62,88,91,110,111,139,141,149,152),] #rem
ove NAs by hand, so Leave ones to create spaces

```

```

HCngPropMotile <- summarySE(MotileI2, measurevar="CngPropMotile", group
vars=c("Order", "TimeCode", "RmTempF"), na.rm=TRUE)
HCngPropMotilegg <- ggplot(HCngPropMotile, aes(x=TimeCode, y=CngPropMot
ile, group=Order, shape=RmTempF))
pd <- position_dodge(0.2)

```

```

HCngPropMotilegg +
  theme_bw() +
  geom_errorbar(aes(ymin=CngPropMotile-se, ymax=CngPropMotile+se), widt
h=.25, position=pd) +
  geom_line(aes(linetype=Order), position=pd) +
  geom_point(position=pd, size =2) +
  geom_vline(xintercept=5, colour= "grey45", linetype="longdash") +
  scale_y_continuous("Change proportion motile sperm", limits=c(-0.4,0.
35), expand=c(0,0)) +
  scale_x_discrete("Sampling time point ", labels = c("T01"="Day1", "T02
"="Day3", "T03"="Day7", "T04"="Day11", "T05"="Day14", "T06"="", "T07"="12 da
y post/Day1", "T08"="Day3", "T09"="Day7", "T10"="Day11", "T11"="Day14", "T1
2"="7 days post", "T13"="12 days post")) +
  theme(axis.text.x = element_text(angle = 45, vjust = 1, hjust=1)) +
  scale_colour_manual(values=c("black", "#666666"))+ scale_shape_manual(
values=c(16,17))+
  theme(legend.position = "none")

```

## Figure S6. Change Cloacal Temperature

```

HCngTemp <- summarySE(Change2, measurevar="CngCloacalTemp", groupvars=c
("Order", "TimeCode", "RmTempF"), na.rm=TRUE)
HCngTempgg <- ggplot(HCngTemp, aes(x=TimeCode, y=CngCloacalTemp, group=
Order, shape=RmTempF))
pd <- position_dodge(0.2)

```

```

HCngTempgg +
  theme_bw() +
  geom_errorbar(aes(ymin=CngCloacalTemp-se, ymax=CngCloacalTemp+se), width=.25, position=pd) +
  geom_line(aes(linetype=Order), position=pd) +
  geom_point(size = 2, position=pd) +
  geom_vline(xintercept=5, colour = "grey45", linetype="longdash") +
  scale_y_continuous("Change in cloacal temperature (°C)", limits=c(-0.5,4.25), expand=c(0,0)) +
  scale_x_discrete("Sampling time point ", labels = c("T01"="Day1", "T02"="Day3", "T03"="Day7", "T04"="Day11", "T05"="Day14", "T06"="", "T07"="12 days post/Day1", "T08"="Day3", "T09"="Day7", "T10"="Day11", "T11"="Day14", "T12"="7 days post", "T13"="12 days post")) +
  theme(axis.text.x = element_text(angle = 45, vjust = 1, hjust=1)) +
  scale_colour_manual(values=c("black", "#666666"))+ scale_shape_manual(values=c(16,17))+
  theme(legend.position = "none")

```
